# Supplementary material for: Armoring SiOx with a conformal LiF layer to boost lithium storage
Source: Royal Society of Chemistry journal article supplement (doi:10.1039/d0ta12508c), 2021-01-01
Supplement: d0ta12508c1.pdf [file d0ta12508c1.pdf]

Supporting Information

## **Armoring SiO<sub>x</sub> with a Conformal LiF Layer to Boost Lithium Storage**

*Tianxing Kang, Jihua Tan, Xiaocui Li, Jianli Liang, Hui Wang, Dong Shen, Yan Wu, Zhongming Huang, Yang Lu, Zhongqiu Tong\*, Chun-Sing Lee\**

T. Kang, J. Tan, J. Liang, Dr. H. Wang, D. Shen, Y. Wu, Z. Huang, Dr. Z. Tong, Prof. C.-S. Lee

Department of Chemistry  
Center of Super-Diamond and Advanced Films (COSDAF)  
City University of Hong Kong  
Tat Chee Avenue, Kowloon, Hong Kong, China  
E-mail: [apcslee@cityu.edu.hk](mailto:apcslee@cityu.edu.hk)

Department of Chemistry  
Center of Super-Diamond and Advanced Films (COSDAF)  
City University of Hong Kong  
Tat Chee Avenue, Kowloon, Hong Kong, China  
College of Materials and Metallurgical Engineering, Guizhou Institute of Technology,  
Guiyang, 550003, Guizhou, China  
E-mail: [zqtong@163.com](mailto:zqtong@163.com)

Dr. X. Li, Prof. Y. Lu  
Department of Mechanical Engineering  
City University of Hong Kong  
Tat Chee Avenue, Kowloon, Hong Kong, China

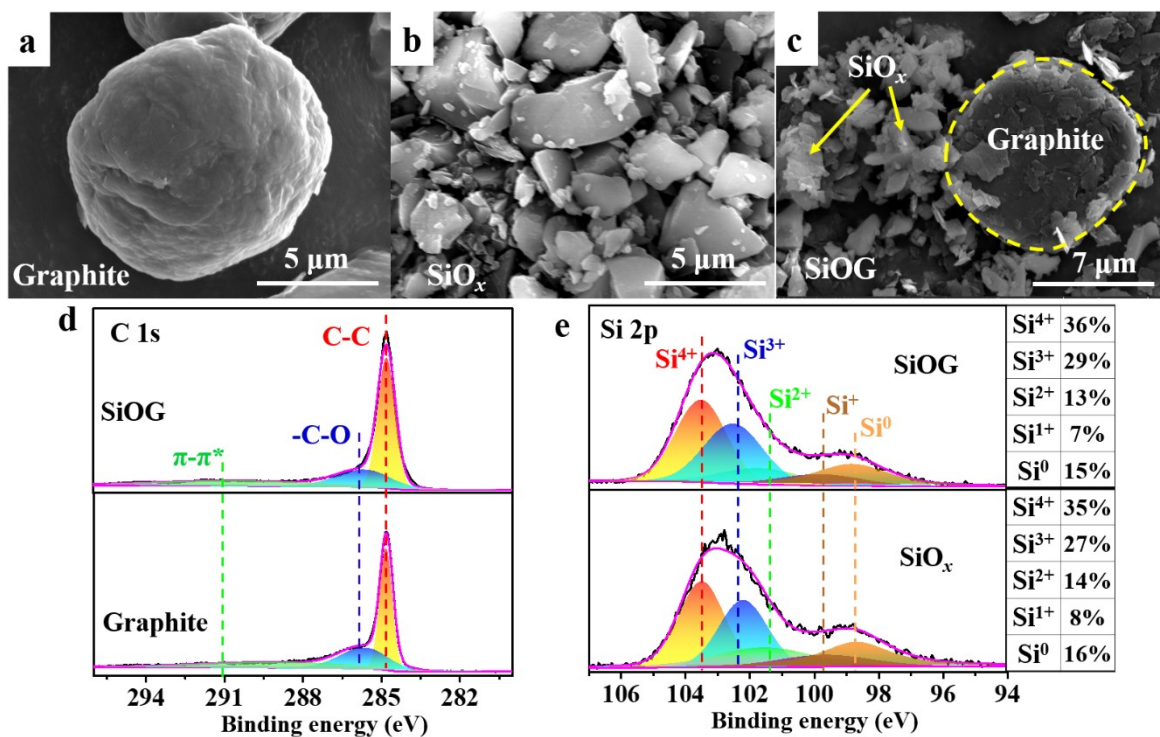

**Figure S1.** (a, b, c) SEM images of graphite, SiO<sub>x</sub> and SiOG. (d) High resolution C 1s XPS spectra of SiOG and graphite. (e) High resolution Si 2p XPS spectra and content of Si in different valence of SiO<sub>x</sub> and SiOG.

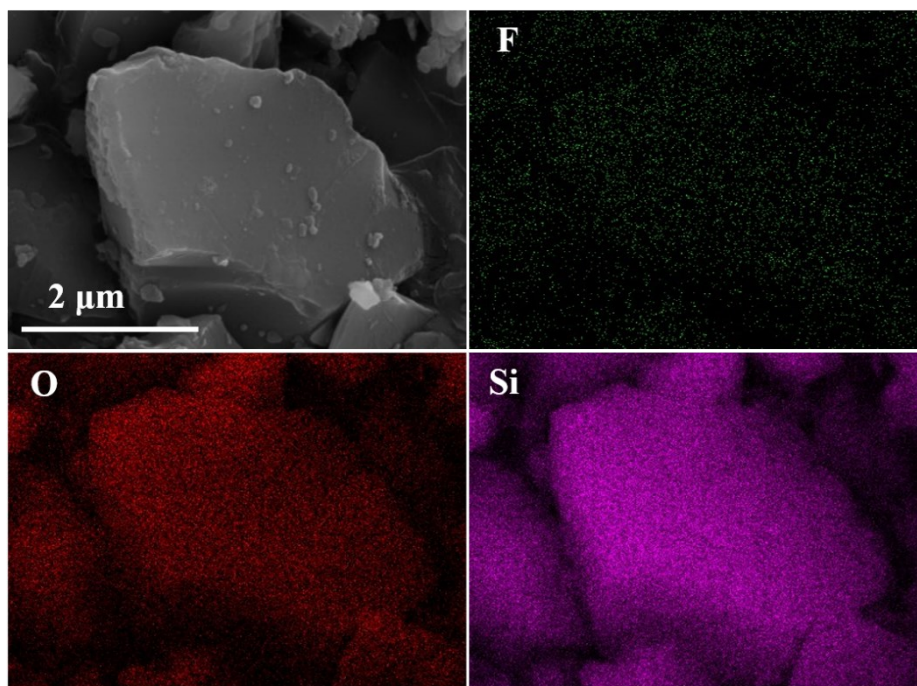

**Figure S2.** SEM images and corresponding element mappings of Si, O and F in SiOG@LiF<sub>3</sub>.

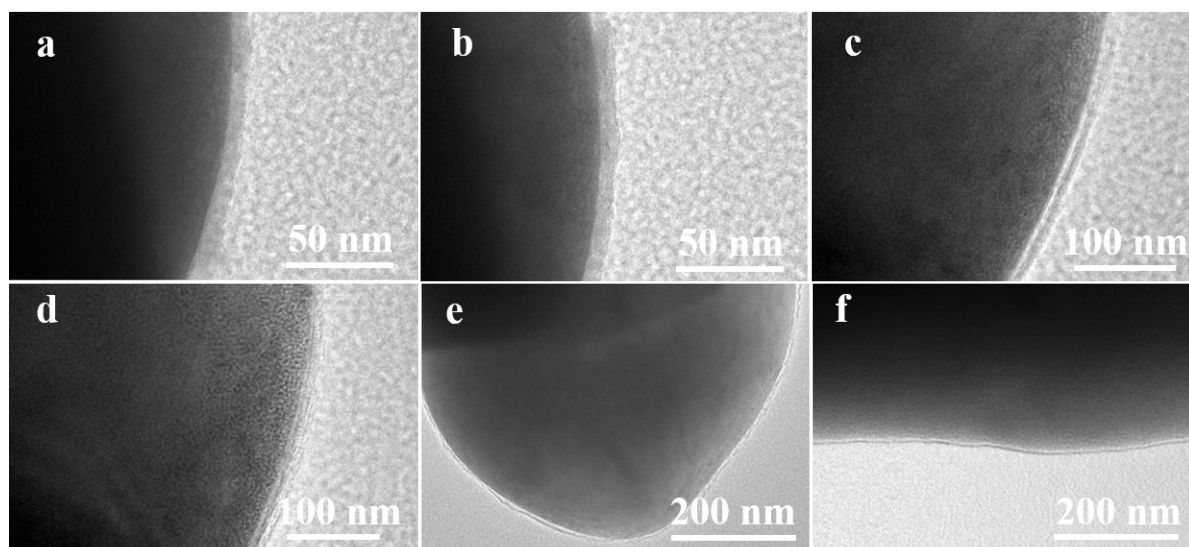

**Figure S3.** TEM images of SiOG@LiF3 at different magnifications.

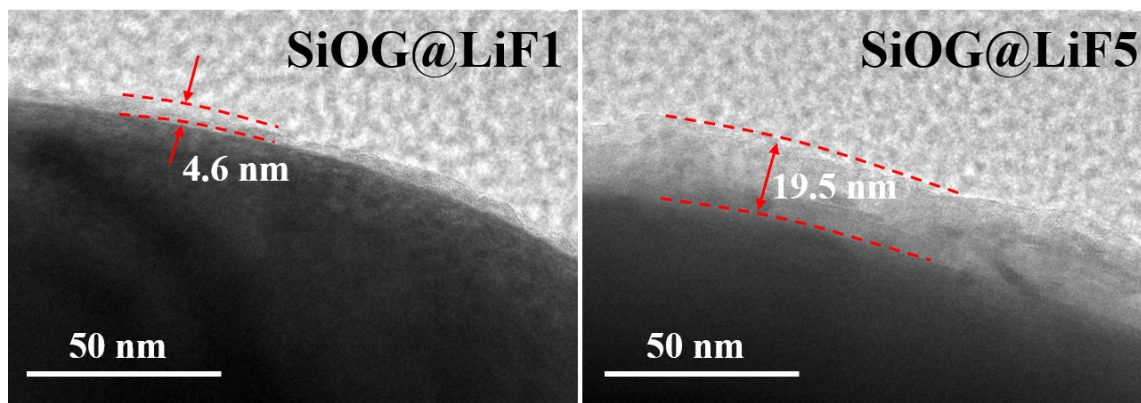

**Figure S4.** TEM images of SiOG@LiF1 and SiOG@LiF5.

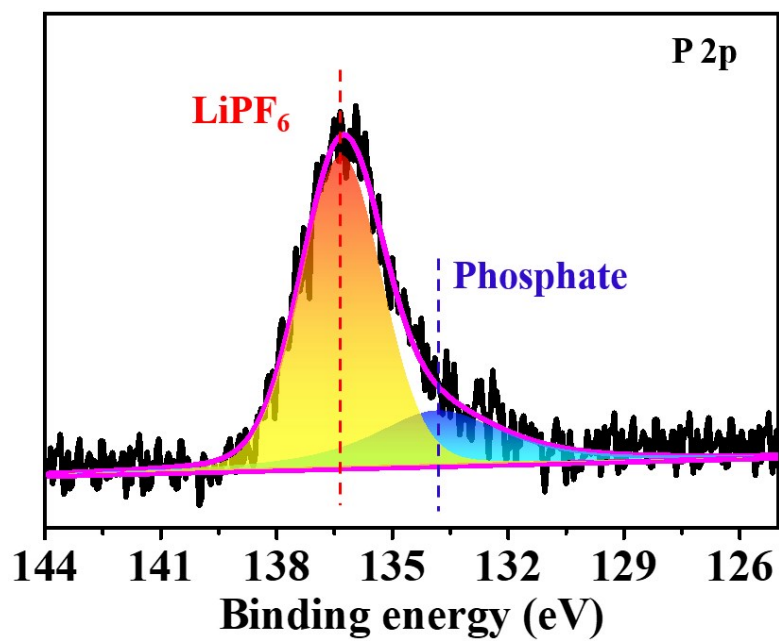

Figure S5. High resolution P 2p of sample SiOG@LiF3 after heating.

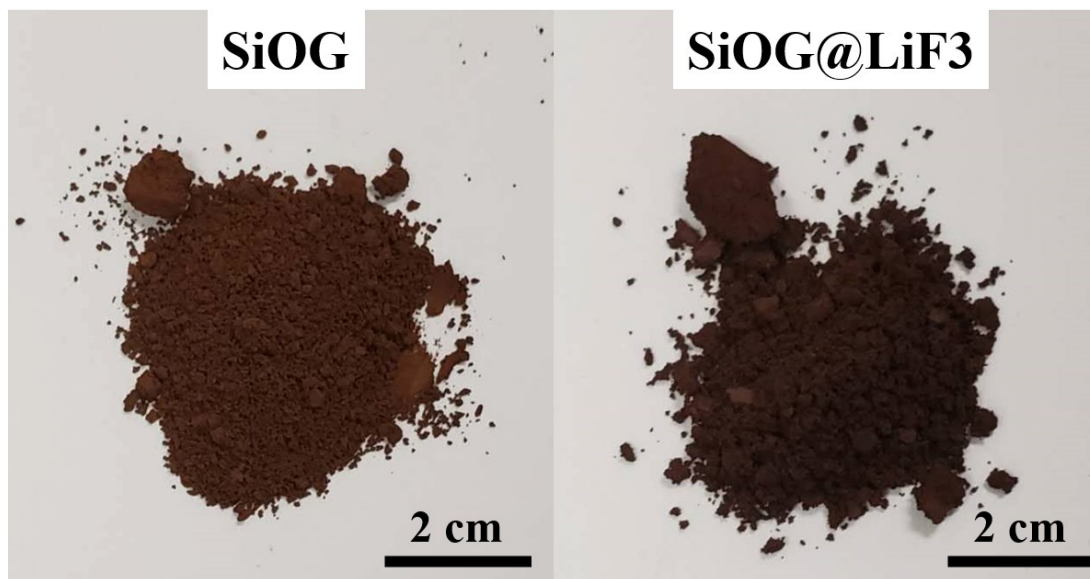

**Figure S6.** Digital images of SiOG and SiOG@LiF3 powder.

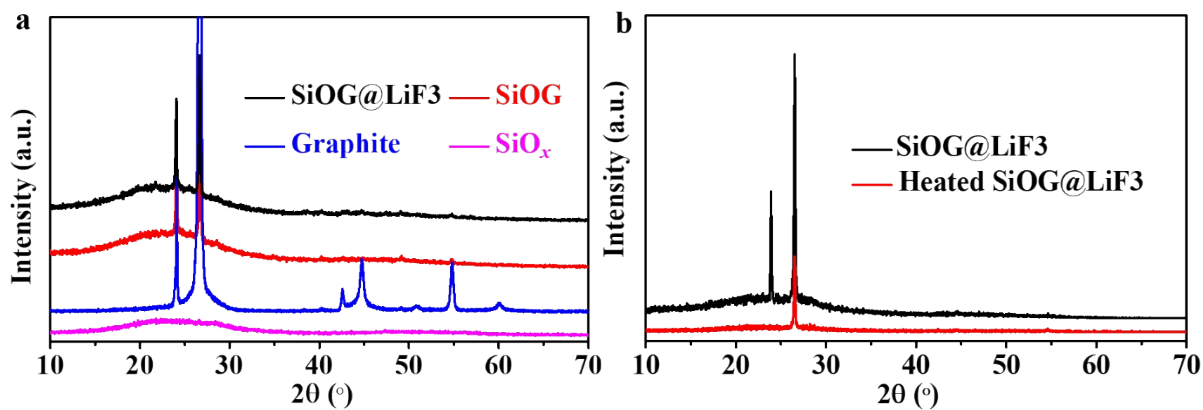

**Figure S7.** (a) XRD pattern of SiO<sub>x</sub>, graphite, SiOG and SiOG@LiF<sub>3</sub>. (b) XRD patterns of SiOG@LiF<sub>3</sub> before and after heating.



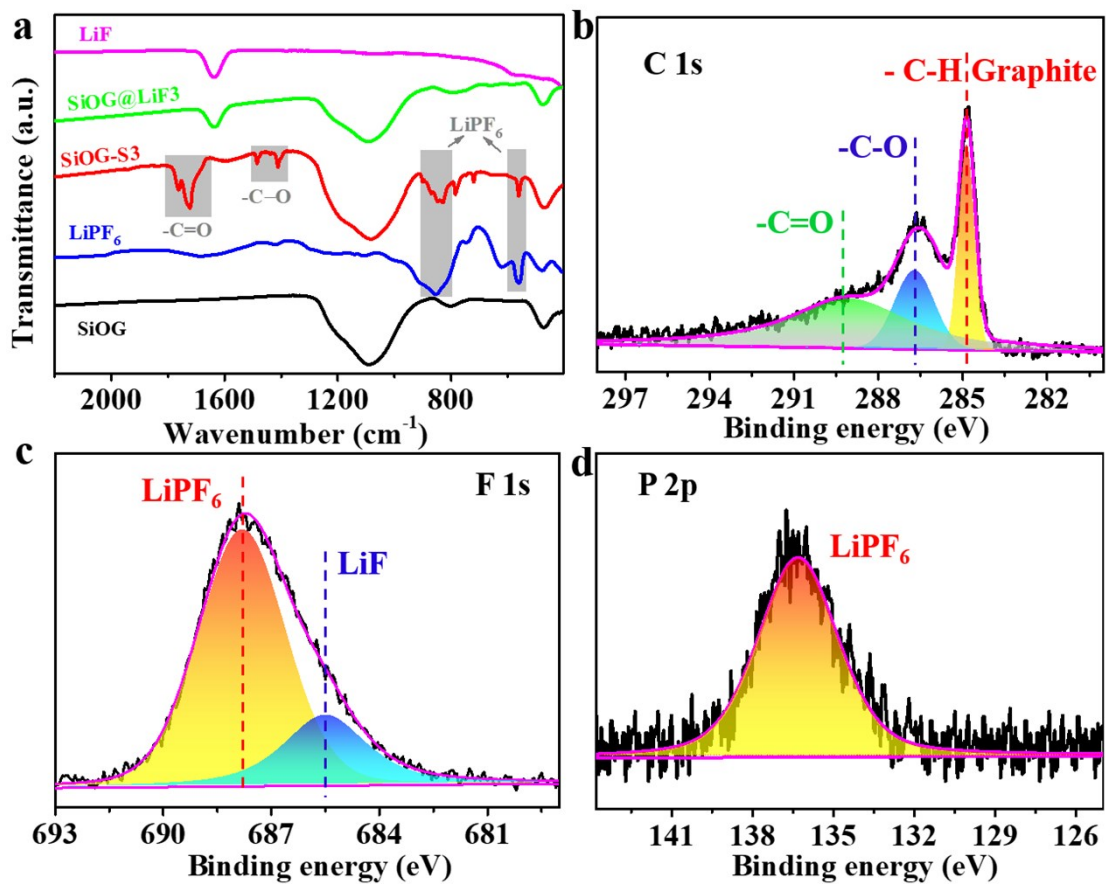

**Figure S8.** (a) FTIR results of samples LiF, SiOG@LiF<sub>3</sub>, SiOG-S3, LiPF<sub>6</sub> and SiOG; (b, c, d) C 1s, F 1s and P 2p of sample SiOG-S3.

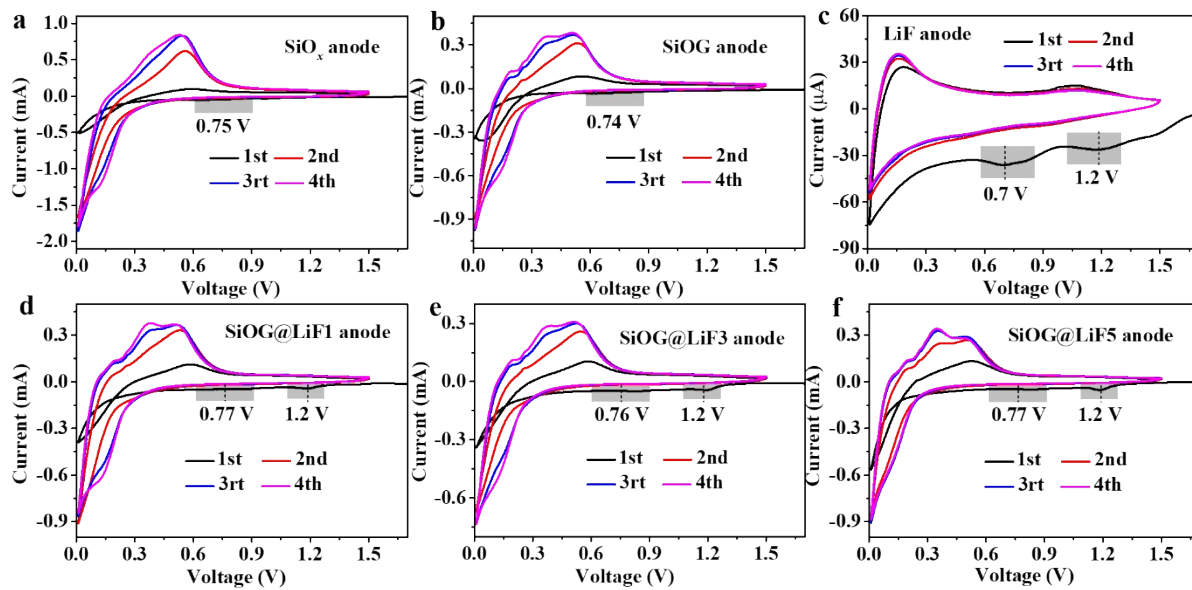

**Figure S9.** CV curves of (a)  $\text{SiO}_x$ , (b) SiOG, (c) LiF anode, (d) SiOG@LiF1, (e) SiOG@LiF3 and (f) SiOG@LiF5. The scan rate is  $0.1 \text{ mV s}^{-1}$ .

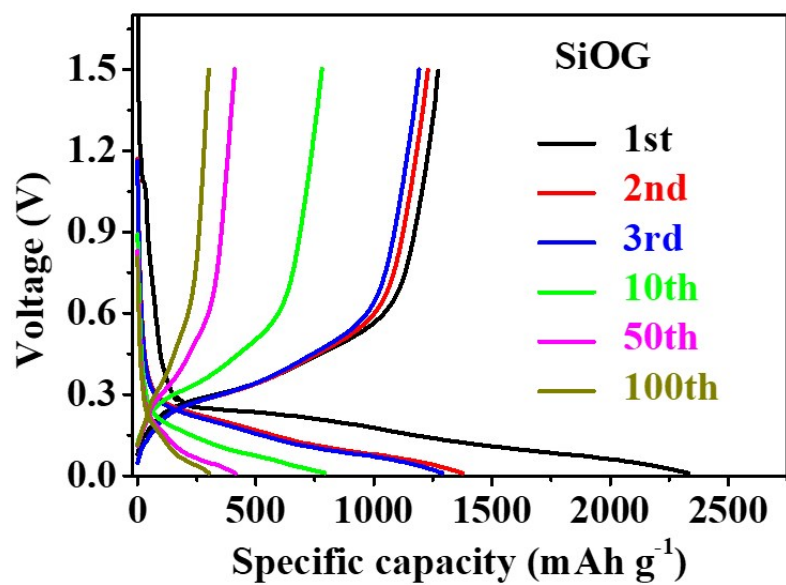

**Figure S10.** Typical charge/discharge profiles of sample SiOG under 500 mA g<sup>-1</sup> and 100 mA g<sup>-1</sup> for the first three cycles.

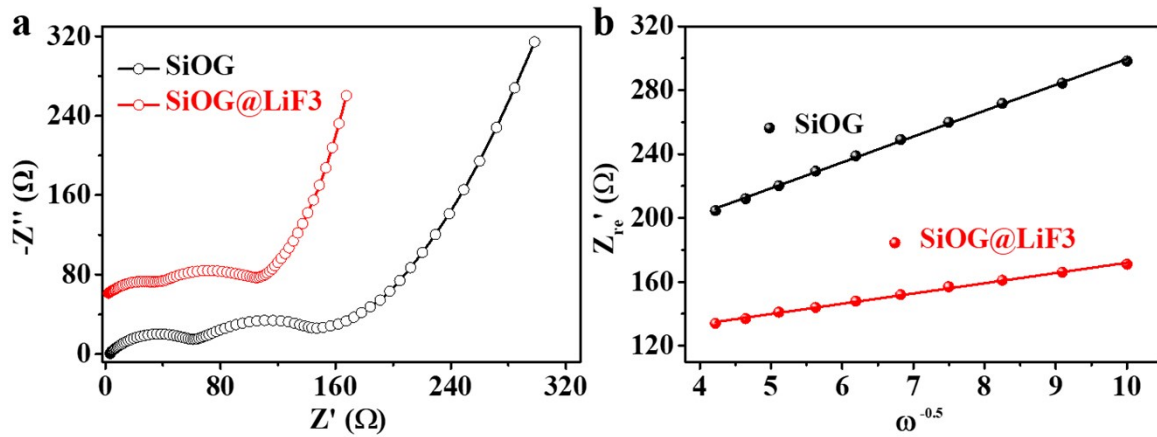

**Figure S11.** (a) Nyquist plots of SiOG and SiOG@LiF3 electrodes after 1 cycle. (b) Linear relationship between real impedance and reciprocal square root of low-angular frequency.

The lithium ion diffusion coefficient ( $D_{Li^+}$ ) can be calculated according to the equations ( $Z_{re} = R_e + R_f + R_{ct} + \sigma_w \omega^{-0.5}$ ;  $D_{Li^+} = 0.5(RT/AF^2\sigma_w C)^2$ ), where  $R$ ,  $T$ ,  $A$ ,  $F$ , and  $C$  are gas constant, absolute temperature, surface area of electrode, Faraday constant and the concentration of lithium ion, respectively.<sup>1</sup> Figure S8a and S8b shows the Nyquist plots of SiOG and SiOG@LiF3 electrodes after 1 cycle and corresponding linear relationship between  $Z'_{re}$  and  $\omega^{-0.5}$  where the Warburg coefficient  $\sigma_w$  can be derived according to above equations. Therefore, the calculated  $D_{Li^+}$  of SiOG and SiOG@LiF3 after 1 cycle are  $7.28 \times 10^{-14}$  and  $5.38 \times 10^{-13}$   $\text{cm}^2 \text{s}^{-1}$  respectively.

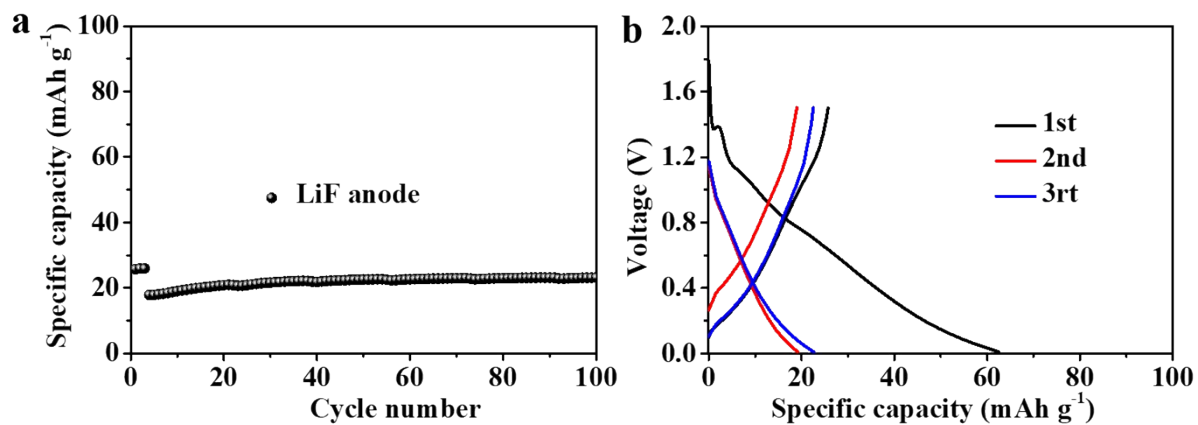

**Figure S12.** Cycling stability (a) and typical charge/discharge profiles (b) of LiF anode under 500 mA g<sup>-1</sup> and 100 mA g<sup>-1</sup> for the first three cycles.

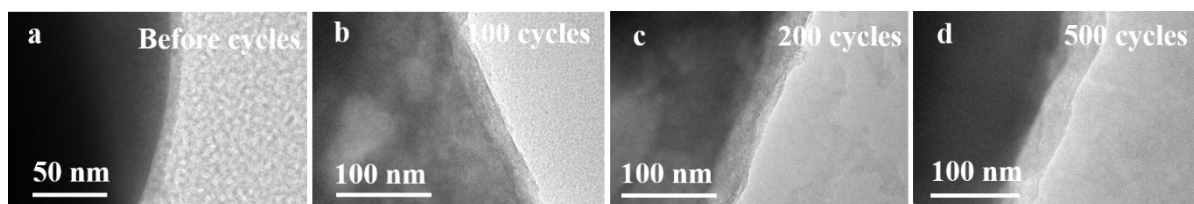

**Figure S13.** (a-d) TEM images of SiOG@LiF3 sample before cycle, after 100 cycles, 200 cycles and 500 cycles.

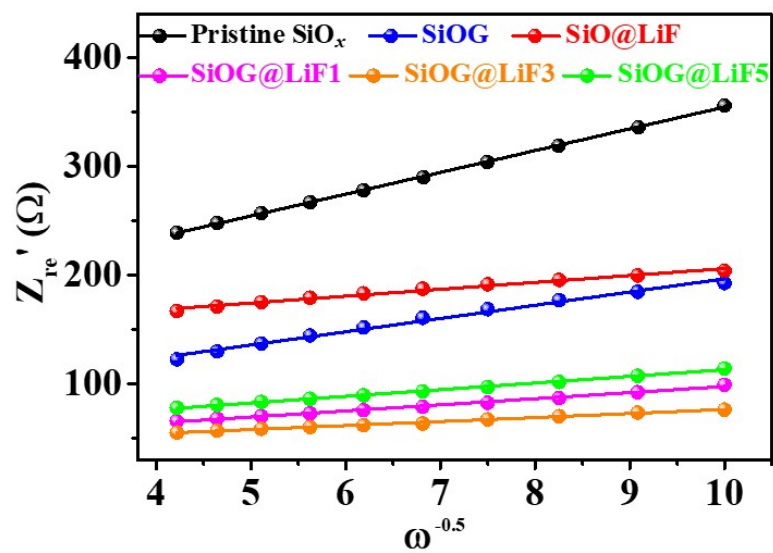

**Figure S14.** Linear relationship between real impedance and reciprocal square root of low-angular frequency.

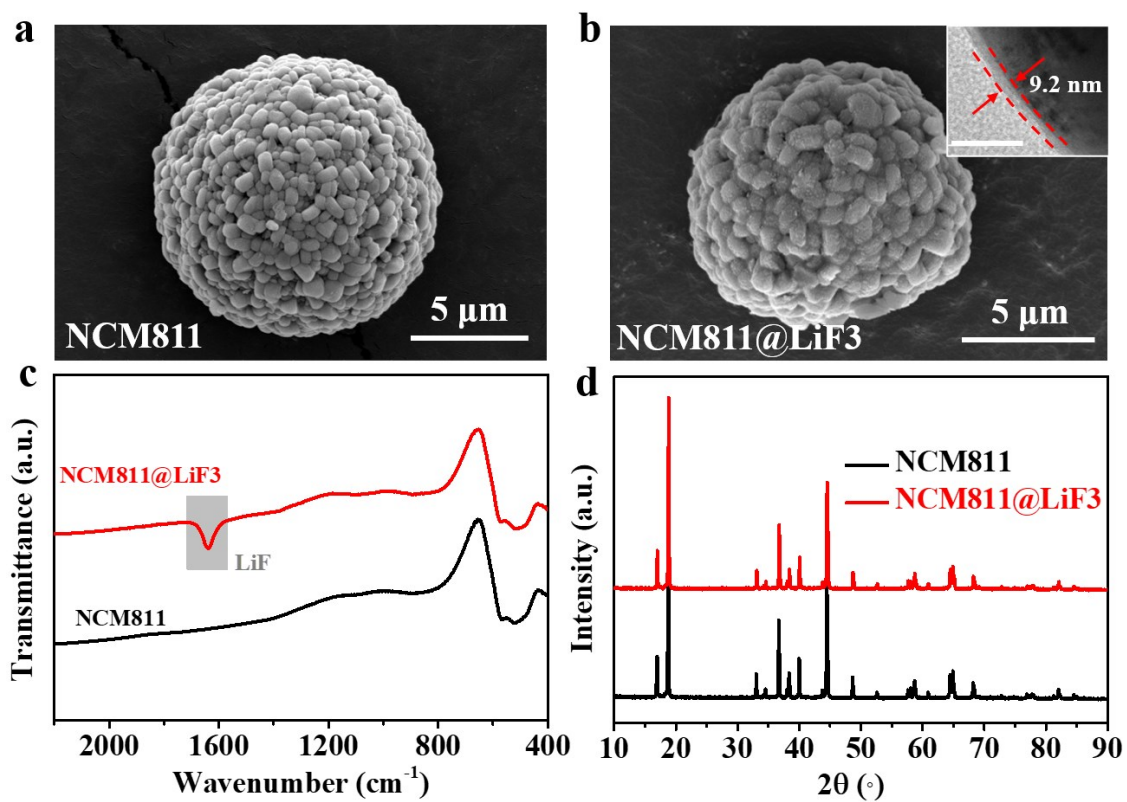

**Figure S15.** SEM images (a, b), FTIR spectrum (c) and XRD patterns (d) of NCM811 and NCM811@LiF3. The inset in Figure S6b is a TEM image of NCM811@LiF3 and the scale bar is 50 μm.



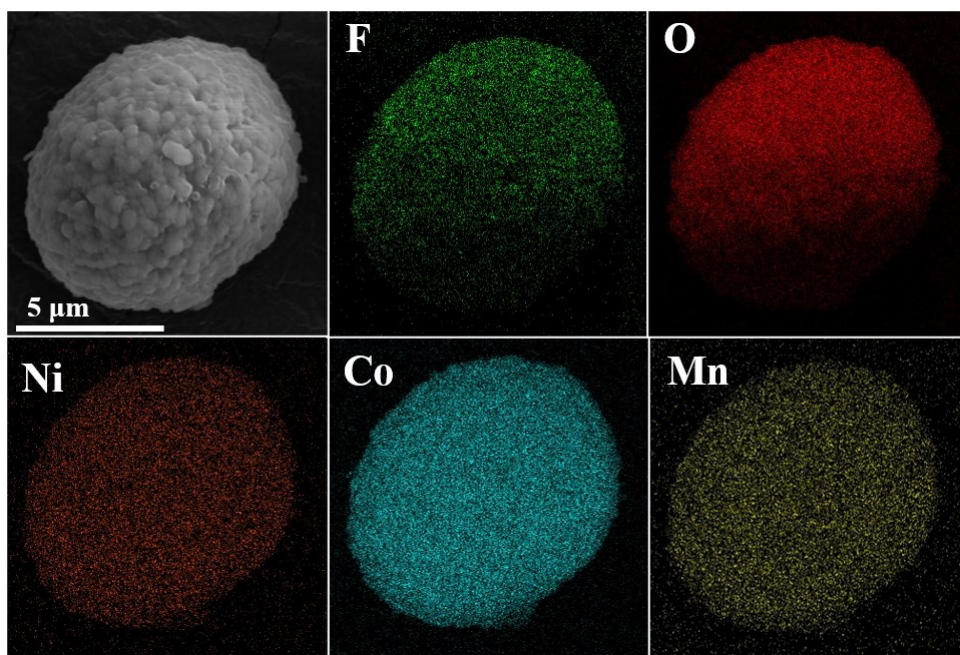

**Figure S16.** SEM images and corresponding element mappings of F, O, Ni, Co and Mn in NCM811@LiF<sub>3</sub>.

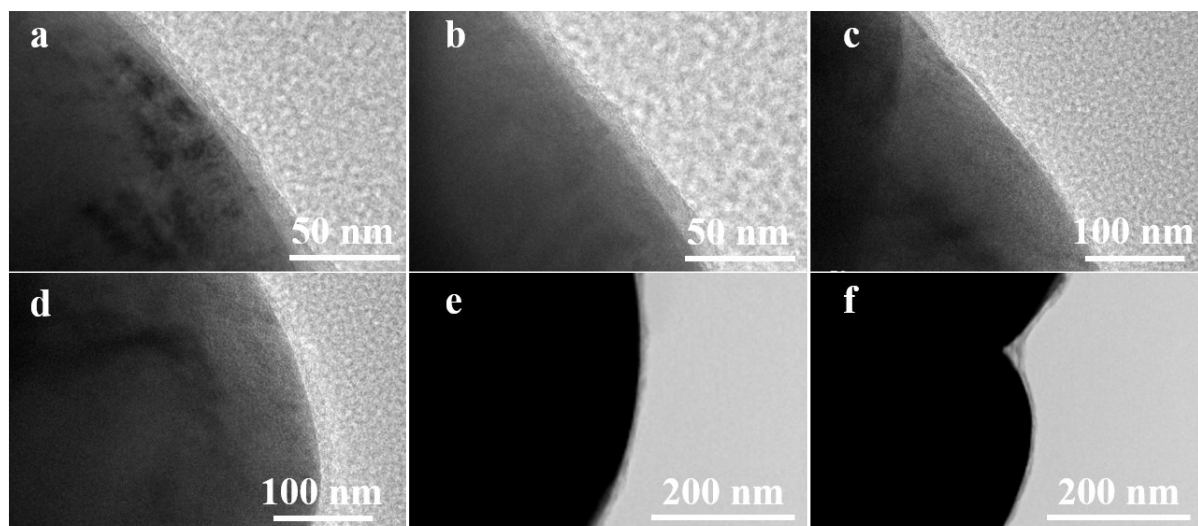

**Figure S17.** TEM images of NCM811@LiF3 at different magnifications.

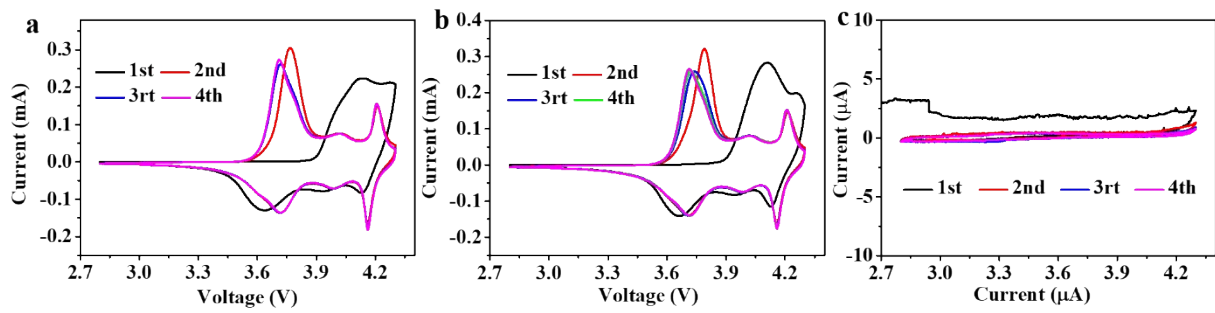

**Figure S18.** CV curves of (a) NCM811, (b) NCM811@LiF3 and (c) LiF cathode. The scan rate is  $0.1 \text{ mV s}^{-1}$ .

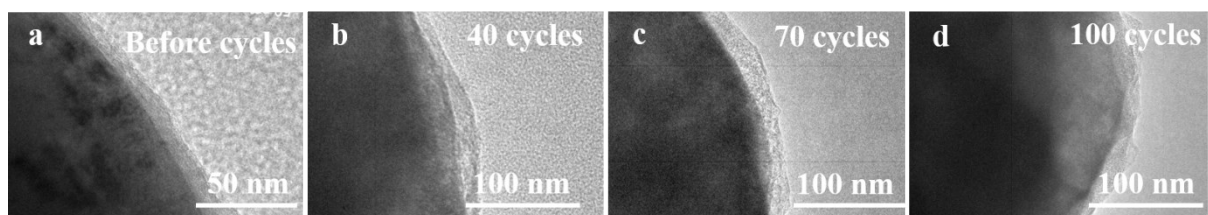

**Figure S19.** (a-d) TEM images of NCM811@LiF3 sample before cycling, after 40, 70 and 100 cycles.

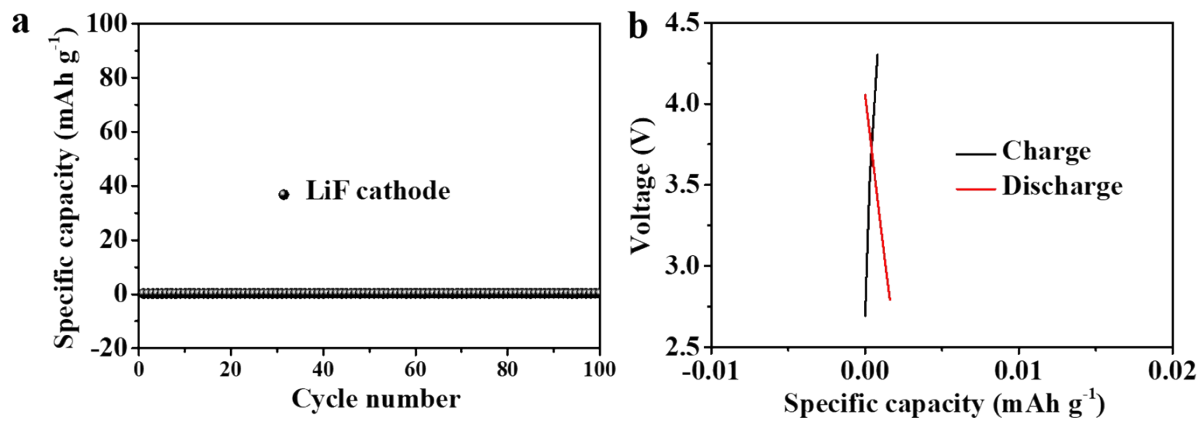

**Figure S20.** Cycling stability (a) and typical charge/discharge profiles (b) of LiF cathode under 100 mA g<sup>-1</sup>.

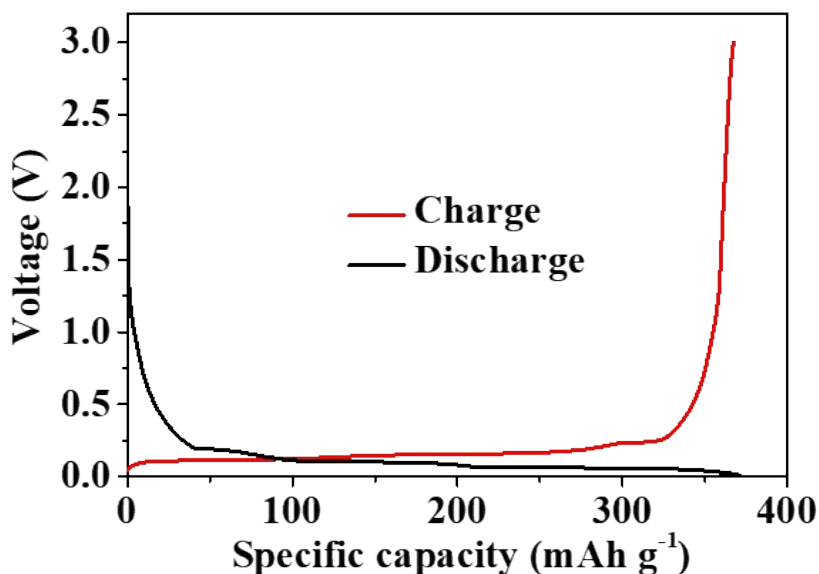

**Figure S21.** The 1<sup>st</sup> charge/discharge curves of graphite anode.

**Note 1.** The portion of  $\text{SiO}_x$  of whole  $\text{SiO}_x$  joined in the electrochemical events can be calculated as the equation:  $P = D_a/D_t$ , where  $P$  is the portion of  $\text{SiO}_x$  of whole  $\text{SiO}_x$  joined in the electrochemical events,  $D_a$  is the actual initial discharge capacity of  $\text{SiO}_x$  in  $\text{SiOG@LiF}_3$  anode,  $D_t$  is the theoretical specific capacity of  $\text{SiO}_x$  ( $\sim 2680 \text{ mAh g}^{-1}$ <sup>12</sup>). The 1<sup>st</sup> discharge capacity of  $\text{SiOG@LiF}_3$  anode is  $2065 \text{ mAh g}^{-1}$ , and 1<sup>st</sup> discharge capacity of graphite anode is  $371 \text{ mAh g}^{-1}$ . Given that the content of graphite in  $\text{SiOG}$  sample is 10 wt% (the corresponding  $\text{SiO}_x$  content is 90%),  $D_a$  of  $\text{SiOG@LiF}_3$  anode is  $2253 \text{ mAh g}^{-1}$  ( $(2065-371*10\%)/90\%$ ). Therefore, the calculated  $P$  of  $\text{SiOG@LiF}_3$  anode is 84.1%, which means about 84.1% of whole  $\text{SiO}_x$  joined the electrochemical events. Note that the capacity contribution of  $\text{LiF}$  can be ignored due to its low capacity (Figure S12) and low content.

**Table S1.** Comparison of the rate performance between SiO<sub>x</sub>-based materials reported recently.

| Materials                               | Current density (mA g <sup>-1</sup> ) | Capacity (mAh g <sup>-1</sup> ) | Ref.      |
|-----------------------------------------|---------------------------------------|---------------------------------|-----------|
| SiO <sub>x</sub> /C-2                   | 200                                   | 792                             | 2         |
|                                         | 600                                   | 620                             |           |
| Sn <sub>2</sub> Fe@30SiO <sub>x</sub>   | 200                                   | 710                             | 3         |
|                                         | 2000                                  | 570                             |           |
| SiO <sub>x</sub> /G/C                   | 300                                   | 750                             | 4         |
|                                         | 3000                                  | 592                             |           |
| SiO <sub>x</sub> -TiO <sub>2</sub> @C   | 200                                   | 916                             | 1         |
|                                         | 3200                                  | 542                             |           |
| SiO <sub>x</sub> /C                     | 325                                   | 645                             | 5         |
|                                         | 3250                                  | 549                             |           |
| SiO <sub>x</sub> /TiO <sub>2</sub> @MLG | 200                                   | 1052                            | 6         |
|                                         | 5000                                  | 429                             |           |
| SiO <sub>x</sub> /C-CVD                 | 200                                   | 1120                            | 7         |
|                                         | 5000                                  | 410                             |           |
| SiO <sub>x</sub> @C                     | 200                                   | 1117                            | 8         |
|                                         | 5000                                  | 426                             |           |
| SiO <sub>x</sub> @G                     | 500                                   | 1100                            | 9         |
|                                         | 5000                                  | 795                             |           |
| C-SiO <sub>x</sub> /C                   | 300                                   | 1410                            | 10        |
|                                         | 7500                                  | 1191                            |           |
| SiO <sub>x</sub> @TiO <sub>2</sub> @C   | 500                                   | 1440                            | 11        |
|                                         | 5000                                  | 1146                            |           |
| SiOG@LiF3                               | 200                                   | 1276                            | This work |
|                                         | 5000                                  | 741                             |           |

**Table S2.** Combined interfacial resistance and  $D_{\text{Li}^+}$  of pristine  $\text{SiO}_x$ ,  $\text{SiO@LiF}_3$ ,  $\text{SiOG}$ ,  $\text{SiOG@LiF}_1$ ,  $\text{SiOG@LiF}_3$  and  $\text{SiOG@LiF}_5$  after 100 cycles

| <b>Samples</b>                                                                               | <b>Pristine <math>\text{SiO}_x</math></b> | <b><math>\text{SiO@LiF}_3</math></b> | <b><math>\text{SiOG}</math></b> | <b><math>\text{SiOG@LiF}_1</math></b> | <b><math>\text{SiOG@LiF}_3</math></b> | <b><math>\text{SiOG@LiF}_5</math></b> |
|----------------------------------------------------------------------------------------------|-------------------------------------------|--------------------------------------|---------------------------------|---------------------------------------|---------------------------------------|---------------------------------------|
| <b><math>R_1</math> (<math>\Omega</math>)</b>                                                | 103.93                                    | 56.48                                | 38.25                           | 15.89                                 | 13.84                                 | 16.55                                 |
| <b><math>R_2</math> (<math>\Omega</math>)</b>                                                | 133.25                                    | 69.26                                | 40.77                           | 22.75                                 | 16.28                                 | 35.38                                 |
| <b>Combined interfacial resistance</b>                                                       | 237.18                                    | 125.74                               | 79.02                           | 38.64                                 | 30.12                                 | 51.93                                 |
| <b><math>D_{\text{Li}^+} \times 10^{-13}</math> (<math>\text{cm}^2 \text{s}^{-1}</math>)</b> | 0.58                                      | 5.8                                  | 0.89                            | 7.3                                   | 9.13                                  | 7.42                                  |



**Table S3.** Calculated HOMO/LUMO energy levels and energy gap of electrolyte compounds (EC, EC, DMC, FEC and LiPF<sub>6</sub>)

| <b>Samples</b>     |             | <b>EMC</b> | <b>EC</b> | <b>DMC</b> | <b>FEC</b> | <b>LiPF<sub>6</sub></b> |
|--------------------|-------------|------------|-----------|------------|------------|-------------------------|
| <b>Energy (eV)</b> | <b>LUMO</b> | 1.21       | 1.07      | 1.15       | 0.52       | -1.61                   |
|                    | <b>HOMO</b> | -7.63      | -8.02     | -7.70      | -8.44      | -10.01                  |
| <b>GAP (eV)</b>    |             | 8.84       | 9.09      | 8.85       | 8.96       | 8.40                    |

## References

1. Z. Li, H. Zhao, P. Lv, Z. Zhang, Y. Zhang, Z. Du, Y. Teng, L. Zhao and Z. Zhu, *Adv. Funct. Mater.*, 2018, **28**, 1605711.
2. Z. Liu, D. Guan, Q. Yu, L. Xu, Z. Zhuang, T. Zhu, D. Zhao, L. Zhou and L. Mai, *Energy Storage Materials*, 2018, **13**, 112-118.
3. H. Zhang, R. Hu, Y. Liu, X. Cheng, J. Liu, Z. Lu, M. Zeng, L. Yang, J. Liu and M. Zhu, *Energy Storage Materials*, 2018, **13**, 257-266.
4. G. Li, J.Y. Li, F.S. Yue, Q. Xu, T.T. Zuo, Y.X. Yin and Y.G. Guo, *Nano Energy*, 2019, **60**, 485-492.
5. Q. Xu, J.K. Sun, Y.X. Yin and Y.G. Guo, *Adv. Funct. Mater.*, 2018, **28**, 1705235.
6. H. Xue, Y. Wu, Y. Zou, Y. Shen, G. Liu, Q. Li, D. Yin, L. Wang and J. Ming, *Adv. Funct. Mater.*, 2020, **30**, 1910657.
7. Z. Liu, Y. Zhao, R. He, W. Luo, J. Meng, Q. Yu, D. Zhao, L. Zhou and L. Mai, *Energy Storage Materials*, 2019, **19**, 299-305.
8. Z. Li, H. Zhao, J. Wang, T. Zhang, B. Fu, Z. Zhang and X. Tao, *Nano Res.*, 2020, **13**, 527-532.
9. Q. Xu, J. K. Sun, Z. L. Yu, Y. X. Yin, S. Xin, S. H. Yu and Y. G. Guo, *Adv. Mater.*, 2018, **30**, 1707430.
10. G. Li, L.B. Huang, M.Y. Yan, J.Y. Li, K.C. Jiang, Y.X. Yin, S. Xin, Q. Xu and Y.G. Guo, *Nano Energy*, 2020, **74**, 104890.
11. Z. Xiao, C. Yu, X. Lin, X. Chen, C. Zhang, H. Jiang, R. Zhang and F. Wei, *Nano Energy*, 2020, **77**, 105082.
12. D. He, P. Li, W. A. Wang, Q. Wan, J. Zhang, K. Xi, X. Ma, Z. Liu, L. Zhang and X. Qu, *Small*, 2020, **16**, 1905736.
